# Supplementary material for: Is Speciation Accompanied by Rapid Evolution? Insights from Comparing Reproductive and Nonreproductive Transcriptomes in Drosophila
Source: PubMed Central journal article supplement (PMC3159995; doi:10.4061/2011/595121), 2011-08-22

**Additional file 2.** Distribution of protein-divergence  $\log_2(P1/P2)$  to divergence-time ratio  $\log_2(T1/T2)$ , between *D. melanogaster*-*D. simulans* vs. *D. yakuba* -*D. erecta* (Supplementary Table 1). The upper limit of the clock-wise category is given by the  $\log_2$  ratio of divergence times (6.5/8.1) and the lower limit by the  $\log_2$  ratio 4.3/12.7. Color codes: Red circles- accelerated evolution, Grey – clock-like, green - slow evolution categories.

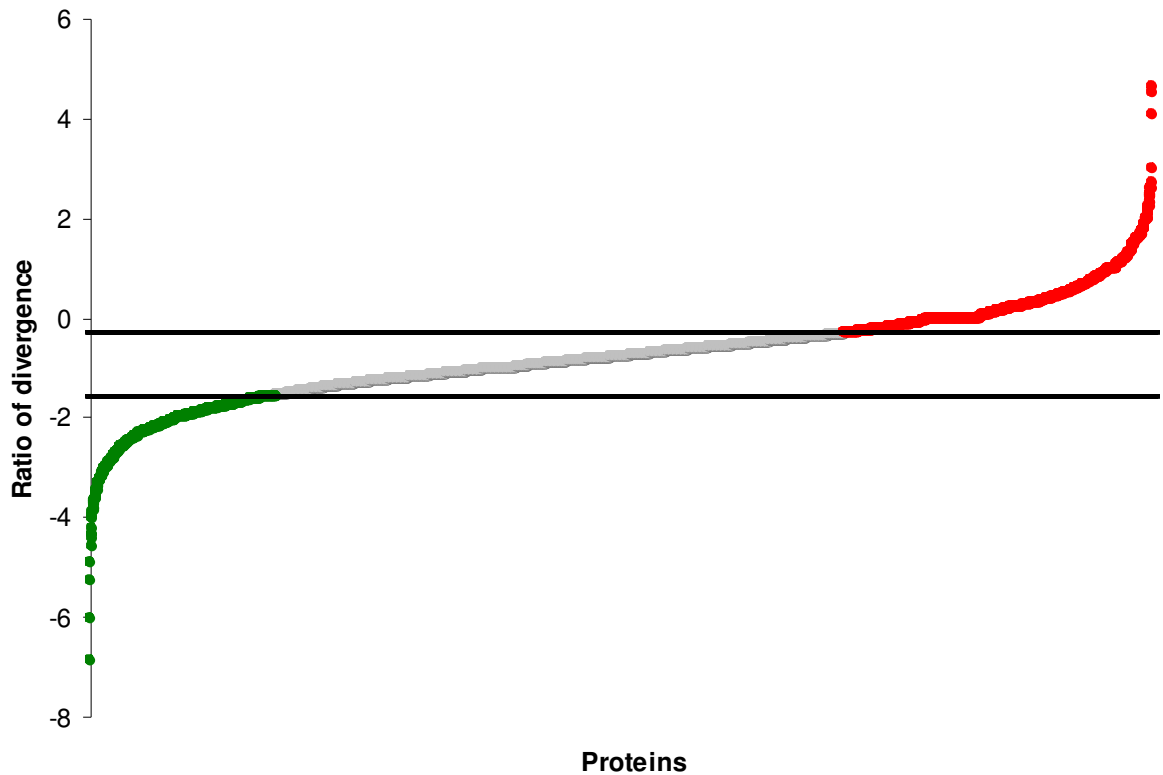

Supplement: 595121.f2.pdf [file 595121.f2.pdf]
