# Supplementary material for: Is Speciation Accompanied by Rapid Evolution? Insights from Comparing Reproductive and Nonreproductive Transcriptomes in Drosophila
Source: PubMed Central journal article supplement (PMC3159995; doi:10.4061/2011/595121), 2011-08-22

**Additional file 3.** Dendrogram of average  $\omega$  estimates of genes falling under slow, clock-like and accelerated rate categories. Branch lengths represent the proportion of genes with  $\omega$  values greater than background  $\omega$  values. P-values for the different tests were corrected using a Bonferroni correction prior to the comparisons. mel: *D. melanogaster*, sim: *D. simulans*, sec: *D. sechellia*, simsecmel: branch leading to the *D. melanogaster* clade, yak: *D. yakuba*, ere: *D. erecta*, yakere, branch leading to the *D. yakuba* clade, ana: *D. ananassae*.

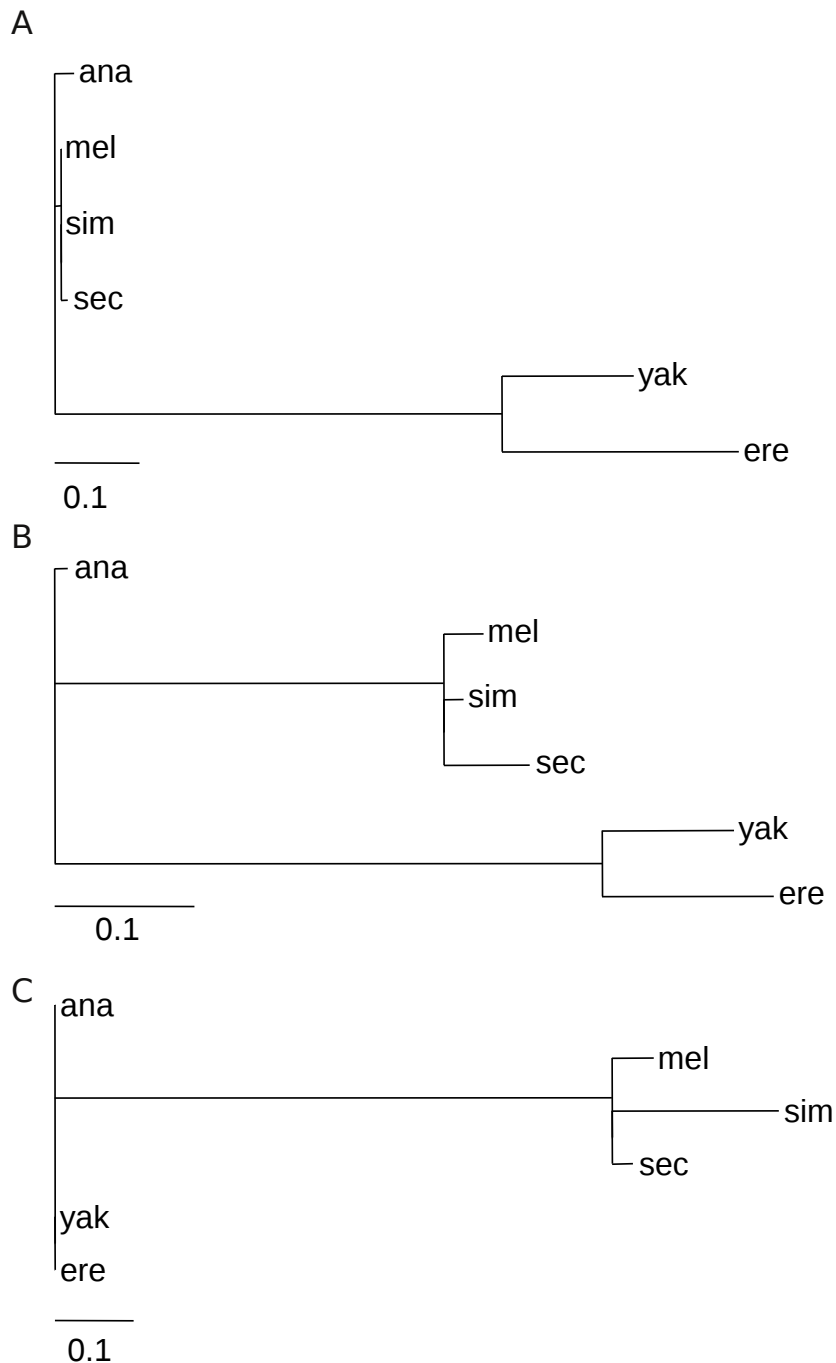

Supplement: 595121.f3.pdf [file 595121.f3.pdf]
